# Supplementary material for: Adsorption of Hg2+ by thiol functionalized hollow mesoporous silica microspheres with magnetic cores
Source: Royal Society of Chemistry journal article supplement (doi:10.1039/c5ra05184c), 2015-01-01
Supplement: c5ra05184c1.pdf [file c5ra05184c1.pdf]

## Electronic Supplementary Information (ESI)

### Adsorption of $\text{Hg}^{2+}$ by thiol functionalized hollow mesoporous silica microspheres with magnetic cores

Xian Zhang,<sup>a,b</sup> Tianxing Wu,<sup>b</sup> Yunxia Zhang,<sup>b</sup> Dickon H. L. Ng,<sup>c</sup>

Huijun Zhao<sup>a</sup> and Guozhong Wang<sup>\*a,b</sup>

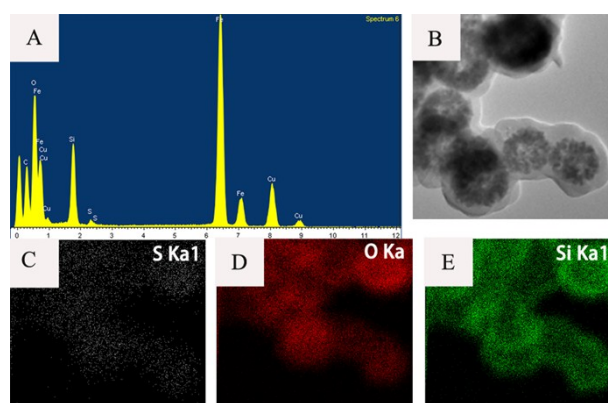

**Fig. S1** (a) EDS spectrum of the SH-HMSMCs, (b) TEM image of the SH-HMSMCs, (c-e) The elemental mapping of the SH-HMSMCs from the HRTEM images, based on the S  $K_{\alpha 1}$ , O  $K_{\alpha}$  and Si  $K_{\alpha 1}$ .

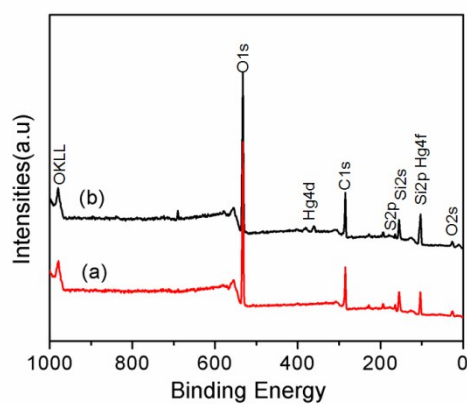

**Fig. S2** The full-range XPS spectra of SH-HMSMCs for  $\text{Hg}^{2+}$  (a) before and (b) after adsorption.

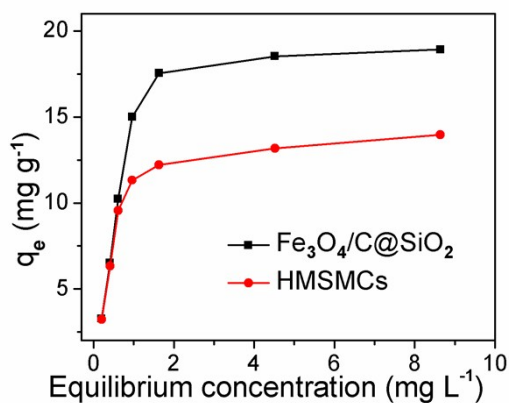

**Fig. S3** Adsorption isotherms of Hg<sup>2+</sup> on the HMSMCs and Fe<sub>3</sub>O<sub>4</sub>/C@SiO<sub>2</sub>.

**Table S1** N<sub>2</sub> sorption-derived textural properties of the prepared Fe<sub>3</sub>O<sub>4</sub>/C@SiO<sub>2</sub>, HMSMCs, SH-HMSMCs.

| Sample                                             | BET surface area<br>(m <sup>2</sup> g <sup>-1</sup> ) | Pore volume<br>(cm <sup>3</sup> g <sup>-1</sup> ) | Pore diameter<br>(nm) |
|----------------------------------------------------|-------------------------------------------------------|---------------------------------------------------|-----------------------|
| Fe <sub>3</sub> O <sub>4</sub> /C@SiO <sub>2</sub> | 102.76                                                | 0.33                                              | 1.70                  |
| HMSMCs                                             | 420.66                                                | 1.11                                              | 2.15                  |
| SH-HMSMCs                                          | 380.75                                                | 0.95                                              | 1.91                  |

**Table S2** The pseudo-second-order rates constant of adsorption kinetics of SH-HMSMCs in aqueous solution of Hg<sup>2+</sup> at room temperature.

| Initial concentration | K <sub>ad</sub> (g mg <sup>-1</sup> min <sup>-1</sup> ) | R <sup>2</sup> |
|-----------------------|---------------------------------------------------------|----------------|
| 1 mg L <sup>-1</sup>  | 3.6 × 10 <sup>-3</sup>                                  | 0.998          |
| 6 mg L <sup>-1</sup>  | 5.6 × 10 <sup>-3</sup>                                  | 0.999          |

**Table S3** Adsorption capacity of SH-HMSMCs for Hg<sup>2+</sup>, Pb<sup>2+</sup>, Cu<sup>2+</sup>, Zn<sup>2+</sup> calculated from the data of Table 1.

|                                             | Hg <sup>2+</sup> | Pb <sup>2+</sup> | Zn <sup>2+</sup> | Cu <sup>2+</sup> |
|---------------------------------------------|------------------|------------------|------------------|------------------|
| adsorption capacity (mmol g <sup>-1</sup> ) | 0.0848           | 0.010            | 0                | 0.031            |

**Table S4** Elution rate of SH-HMSMCs saturated with adsorbed Pb<sup>2+</sup> or Cu<sup>2+</sup> in a solution with or without Hg<sup>2+</sup>, 50 mg adsorbent saturated Cu<sup>2+</sup> (Pb<sup>2+</sup>) was added to 100 ml Hg<sup>2+</sup> (10 mg L<sup>-1</sup>) and aqueous solution at room temperature with agitation. The metal concentrations in solution were analyzed by ICP.

|                                      | Water solution (PH=6) |                  | Hg <sup>2+</sup> (10 mg L <sup>-1</sup> ) solution (PH=6) |                          |
|--------------------------------------|-----------------------|------------------|-----------------------------------------------------------|--------------------------|
|                                      | Pb <sup>2+</sup>      | Cu <sup>2+</sup> | Pb <sup>2+</sup>                                          | Cu <sup>2+</sup>         |
| Elution rate                         | 1.2%                  | 1.8%             | 23.7%                                                     | 19.5%                    |
| Hg <sup>2+</sup> adsorption capacity | --                    | --               | 125.3 mg g <sup>-1</sup>                                  | 119.5 mg g <sup>-1</sup> |

**Table S5** The concentrations of metal ions in solutions before and after treated with SH-HMSMCs samples analyzed by ICP-MS. 20 ml single kind of heavy metal ion solution was mixed with 5 mg adsorbent at room temperature with agitation for 12 h.

|           | Hg <sup>2+</sup> (μg L <sup>-1</sup> ) |        | Pb <sup>2+</sup> (μg L <sup>-1</sup> ) |       | Zn <sup>2+</sup> (μg L <sup>-1</sup> ) |        | Cu <sup>2+</sup> (μg L <sup>-1</sup> ) |        |
|-----------|----------------------------------------|--------|----------------------------------------|-------|----------------------------------------|--------|----------------------------------------|--------|
|           | Original solution                      | 500.50 | 49.41                                  | 596.9 | 61.20                                  | 898.40 | 65.50                                  | 700.80 |
| SH-HMSMCs | 0.53                                   | 0.56   | 10.87                                  | 3.19  | 724.09                                 | 33.9   | 68.63                                  | 11.66  |

**Table S6** Langmuir and Freundlich isotherms parameters for Hg<sup>2+</sup> adsorption.

| adsorbent                                             | Langmuir model          |                         |                | Freundlich model |      |                |
|-------------------------------------------------------|-------------------------|-------------------------|----------------|------------------|------|----------------|
|                                                       | Q (mg g <sup>-1</sup> ) | B (L mg <sup>-1</sup> ) | R <sup>2</sup> | K <sub>F</sub>   | n    | R <sup>2</sup> |
| SH-HMSMCs-A                                           | 118.6                   | 4.90                    | 0.98           | 1.80             | 3.28 | 0.94           |
| SH-HMSMCs-B                                           | 110.1                   | 4.96                    | 0.99           | 1.77             | 3.50 | 0.93           |
| SH-HMSMCs                                             | 101.5                   | 5.63                    | 0.98           | 1.75             | 3.67 | 0.92           |
| SH-Fe <sub>3</sub> O <sub>4</sub> /C@SiO <sub>2</sub> | 62.8                    | 4.40                    | 0.99           | 1.45             | 3.45 | 0.95           |

**Table S7** Comparison the self-made adsorbent with some research results of other researchers that treat Hg<sup>2+</sup>

| Adsorbents                                                                                 | Q <sub>m</sub> (mg g <sup>-1</sup> ) | Lowest equilibrium concentration | Ref.      |
|--------------------------------------------------------------------------------------------|--------------------------------------|----------------------------------|-----------|
| Microporous and layered titanosilicates                                                    | --                                   | 2 µg L <sup>-1</sup>             | [41]      |
| Multifunctional mesoporous material                                                        | 21.05                                | 50 µg L <sup>-1</sup>            | [42]      |
| Fe <sub>3</sub> O <sub>4</sub> @C Nanoparticles Modified with -SO <sub>3</sub> H and -COOH | 83.1                                 | --                               | [43]      |
| Naphthalimide-functionalized magnetic nanosensor                                           | 5.6                                  | --                               | [44]      |
| Self-made SH-HMSMCs                                                                        | 118.6                                | 0.53 µg L <sup>-1</sup>          | This work |
